# Supplementary material for: A randomised trial of granulocyte-macrophage colony-stimulating factor for neonatal sepsis: childhood outcomes at 5 years
Source: PubMed Central journal article supplement (PMC4484494; doi:10.1136/archdischild-2014-307410), 2015-04-28
Supplement: fetalneonatal-2014-307410-s1.pdf [file fetalneonatal-2014-307410-s1.pdf]

**Web appendix for:**

**A randomised trial of granulocyte-macrophage colony-stimulating factor for neonatal sepsis: Childhood outcomes at 5 years**

Neil Marlow, Timothy Morris, Peter Brocklehurst, Robert Carr, Frances Cowan, Nishma Patel, Stavros Petrou, Margaret Redshaw, Neena Modi, Caroline J Doré

*Correspondence to:*

**Neil Marlow**

Professor of Neonatal Medicine  
UCL Institute for Women's Health  
74 Huntley Street  
London WC1E 6AU  
United Kingdom

**Tel:** +44 20 7679 0834

**Fax:** +44 20 3108 2036

**Email:** [n.marlow@ucl.ac.uk](mailto:n.marlow@ucl.ac.uk)

**Web table S1: Comparison of infant and maternal characteristics at trial entry and short term outcomes between surviving children who were or were not followed up for PROGRAMS trial groups at 5 years of age**

|                                                                             | Followed up<br>(n = 164) |          | Not followed up<br>(n = 52) |          | Difference<br>or relative<br>risk (RR) | 95% CI for<br>difference or<br>RR |
|-----------------------------------------------------------------------------|--------------------------|----------|-----------------------------|----------|----------------------------------------|-----------------------------------|
|                                                                             | n or<br>median           | % or IQR | n or<br>median              | % or IQR |                                        |                                   |
| <b>Characteristics at trial entry</b>                                       |                          |          |                             |          |                                        |                                   |
| Male, n (%)                                                                 | 79                       | 48%      | 23                          | 44%      | 1.1                                    | 0.7 to 1.5                        |
| Age at recruitment, h, median (IQR)                                         | 45                       | 26, 63   | 41                          | 22, 55   | 4.4                                    | -1.7 to 11.0                      |
| Gestational age, weeks, median (IQR)                                        | 29                       | 28, 30   | 29                          | 27, 30   | 0                                      | -0.6 to 0.4                       |
| Birthweight, g, median (IQR)                                                | 805                      | 646, 933 | 840                         | 718, 951 | -37                                    | -95 to 20                         |
| Neutrophil count at trial entry, x10 <sup>9</sup> /L, median (IQR)          | 2.8                      | 1.3, 4.3 | 2.0                         | 1.2, 3.7 | 0.3                                    | -0.3 to 0.9                       |
| Neutropenia (<1.1x10 <sup>9</sup> /L) at trial entry, n (%)                 | 26                       | 16%      | 9                           | 17%      | 0.9                                    | 0.5 to 1.8                        |
| Multiple pregnancies, n (%)                                                 | 40                       | 24%      | 13                          | 25%      | 1.0                                    | 0.6 to 1.7                        |
| Maternal antenatal steroids administered 4 h or more before delivery, n (%) | 129/139                  | 93%      | 45/47                       | 96%      | 1.0                                    | 0.9 to 1.1                        |
| Infants given surfactant within 4 h of birth, n (%)                         | 115/126                  | 91%      | 37/42                       | 88%      | 1.0                                    | 0.9 to 1.2                        |
| Cranial ultrasound findings at trial entry                                  |                          |          |                             |          |                                        |                                   |
| Normal                                                                      | 128/158                  | 81%      | 42                          | 81%      |                                        |                                   |
| Minor abnormality                                                           | 26/158                   | 16%      | 7                           | 13%      |                                        |                                   |
| Severe abnormality                                                          | 4/158                    | 3%       | 3                           | 6%       |                                        |                                   |
| <b>Short term outcomes</b>                                                  |                          |          |                             |          |                                        |                                   |
| Necrotising enterocolitis (confirmed at surgery or post mortem)             | 5                        | 3%       | 1                           | 2%       | 1.6                                    | 0.2 to 13.3                       |
| Sepsis: culture positive to day 28 from trial entry                         | 41                       | 25%      | 10                          | 19%      | 1.3                                    | 0.7 to 2.4                        |
| Sepsis: culture positive and probable to day 28                             | 51                       | 31%      | 17                          | 33%      | 0.9                                    | 0.6 to 1.5                        |
| Cranial ultrasound findings                                                 |                          |          |                             |          |                                        |                                   |
| Normal                                                                      | 108/138                  | 78%      | 31/45                       | 69%      |                                        |                                   |
| Minor abnormality                                                           | 20/138                   | 15%      | 10/45                       | 22%      |                                        |                                   |
| Severe abnormality                                                          | 10/138                   | 7%       | 4/45                        | 9%       |                                        |                                   |
| Oxygen dependency at day 28, n (%)                                          | 102                      | 62%      | 29                          | 56%      | 1.1                                    | 0.9 to 1.5                        |
| Oxygen dependency at 36 weeks PMA, n (%)                                    | 79                       | 48%      | 21                          | 40%      | 1.2                                    | 0.8 to 1.7                        |

For categorical variables summary measures are number, %, relative risk and 95% confidence interval (CI).

For continuous variables summary measures are median, interquartile range (IQR), difference in medians and 95% CI.

The denominator is the entire population, unless otherwise stated.

**Web table S2: Infant and maternal characteristics at trial entry and short term outcomes for all children followed up for PROGRAMS trial groups at 5 years of age.**

|                                                                            | GM-CSF<br>(n = 83) |          | Control<br>(n = 81) |          | Difference<br>or relative<br>risk (RR) | 95% CI for<br>difference or<br>RR |
|----------------------------------------------------------------------------|--------------------|----------|---------------------|----------|----------------------------------------|-----------------------------------|
|                                                                            | n or<br>median     | % or IQR | n or<br>median      | % or IQR |                                        |                                   |
| <b>Characteristics at trial entry</b>                                      |                    |          |                     |          |                                        |                                   |
| Male, n (%)                                                                | 39                 | 47%      | 40                  | 49%      | 1.0                                    | (0.7 to 1.3)                      |
| Age at recruitment, h, median (IQR)                                        | 46                 | 24, 53   | 46                  | 27, 64   | 1                                      | (-3 to 9)                         |
| Gestational age, weeks, median (IQR)                                       | 29                 | 27, 30   | 29                  | 28, 30   | -0.1                                   | (-0.7 to 0.3)                     |
| Birthweight, g, median (IQR)                                               | 830                | 655, 930 | 785                 | 625, 955 | -10                                    | (-69 to 48)                       |
| Neutrophil count at trial entry, x10 <sup>9</sup> /L, median (IQR)         | 2.7                | 1.3, 4.4 | 2.8                 | 1.3, 4.3 | 0.1                                    | (-0.5 to 0.8)                     |
| Neutropenia (<1.1x10 <sup>9</sup> /L) at trial entry, n (%)                | 14/80              | 18%      | 12/76               | 16%      | 1.1                                    | (0.5 to 2.2)                      |
| Multiple pregnancies, n (%)                                                | 23                 | 27%      | 17                  | 21%      | 1.3                                    | (0.8 to 2.3)                      |
| Maternal antenatal steroids administered 4h or more before delivery, n (%) | 63/70              | 90%      | 66/69               | 96%      | 0.94                                   | (0.9 to 1.0)                      |
| Infants given surfactant within 4h of birth, n (%)                         | 58/65              | 89%      | 57/61               | 93%      | 1.0                                    | (0.9 to 1.1)                      |
| Cranial ultrasound findings at trial entry                                 |                    |          |                     |          |                                        |                                   |
| Normal                                                                     | 64/82              | 78%      | 64/76               | 84%      |                                        |                                   |
| Minor abnormality                                                          | 17/82              | 21%      | 9/76                | 12%      |                                        |                                   |
| Severe abnormality                                                         | 1/82               | 1%       | 3/76                | 4%       |                                        |                                   |
| <b>Short term outcomes</b>                                                 |                    |          |                     |          |                                        |                                   |
| Necrotising enterocolitis (confirmed at surgery or post mortem)            | 2                  | 2%       | 3                   | 4%       | 0.7                                    | (0.1 to 3.8)                      |
| Sepsis: culture positive to day 28 from trial entry                        | 24                 | 29%      | 17                  | 21%      | 1.4                                    | (0.8 to 2.4)                      |
| Sepsis: culture positive and probable to day 28                            | 25                 | 30%      | 26                  | 32%      | 0.9                                    | (0.6 to 1.5)                      |
| Cranial ultrasound findings                                                |                    |          |                     |          |                                        |                                   |
| Normal                                                                     | 57/66              | 86%      | 51/72               | 71%      |                                        |                                   |
| Minor abnormality                                                          | 5/66               | 8%       | 15/72               | 21%      |                                        |                                   |
| Severe abnormality                                                         | 4/66               | 6%       | 6/72                | 8%       |                                        |                                   |
| Oxygen dependency at day 28, n (%)                                         | 57                 | 69%      | 45                  | 56%      | 1.2                                    | (1.0 to 1.6)                      |
| Oxygen dependency at 36 weeks PMA, n (%)                                   | 45                 | 54%      | 34                  | 42%      | 1.3                                    | (0.9 to 1.8)                      |

For categorical variables summary measures are number, %, relative risk and 95% confidence interval (CI).

For continuous variables summary measures are median, interquartile range (IQR), difference in medians and 95% CI.

The denominator is the entire population, unless otherwise stated.

**Web table S3: Parental information (taken from 2y assessment) based on population examined in PROGRAMS trial groups at 5 years of age**

| Variable                                     | GM-CSF ( <i>n</i> = 62) |            | Control ( <i>n</i> = 66) |            |
|----------------------------------------------|-------------------------|------------|--------------------------|------------|
|                                              | No.                     |            | No.                      |            |
| <u>Marital status</u>                        |                         |            |                          |            |
| Married                                      | 44                      | 71%        | 40                       | 60%        |
| Living with partner                          | 11                      | 18%        | 17                       | 26%        |
| Single                                       | 7                       | 11%        | 14                       | 14%        |
| Biological parents at home                   | 52/61                   | 85%        | 55                       | 83%        |
| <u>Housing</u>                               |                         |            |                          |            |
| Home owner                                   | 40/51                   | 78%        | 38/52                    | 73%        |
| Rooms in home median (IQR)                   | 5                       | 4, 6       | 5                        | 3,6        |
| Use of telephone                             | 60                      | 97%        | 63                       | 95%        |
| Use of Car                                   | 56                      | 90%        | 55                       | 83%        |
| <u>Mother's educational level</u>            |                         |            |                          |            |
| O'Level/GCSE/equivalent or lesser*           | 30                      | 48%        | 26                       | 39%        |
| <u>Parental employment status</u>            |                         |            |                          |            |
| Mother working                               | 31/61                   | 51%        | 32/64                    | 50%        |
| Mother in full time education                | 0                       | 0%         | 2                        | 3%         |
| Mother not working or in full time education | 30                      | 48%        | 32                       | 48%        |
| Father working                               | 51/57                   | 89%        | 54/60                    | 90%        |
| <u>Social index (median (IQR))</u>           | <b><i>n</i> = 52</b>    |            | <b><i>n</i> = 47</b>     |            |
| Index of multiple deprivation (2007)         | 19                      | 10, 31     | 19                       | 10, 34     |
| Income deprivation affecting children index  | 0.21                    | 0.09, 0.41 | 0.29                     | 0.12, 0.45 |

*Notes: \* qualifications for school leaver at age 16 in English school (GCSE: General Certificate of Secondary Education); note this excludes higher educational progression*

**Web table S4: Hospital admissions over the past 12 months for PROGRAMS trial groups at 5 years of age**

| <b>Outcome</b>                                | <b>GM-CSF (n = 62)</b> | <b>Control (n = 54)</b> | <b>Risk ratio (95% CI)</b> |
|-----------------------------------------------|------------------------|-------------------------|----------------------------|
| Respiratory admission (n)                     | 3 (5%)                 | 5 (9%)                  | 0.5 (0.1 to 2.1)           |
| Median* (Upper Quartile; Max)                 | 1 (1; 1)               | 1 (1; 1)                |                            |
| Surgical admission (n)                        | 9 (14%)                | 5 (9%)                  | 1.6 (0.6 to 4.4)           |
| Median* (Upper Quartile; Max)                 | 1 (2; 2)               | 1 (1; 1)                |                            |
| ICU admission and mechanically ventilated (n) | 0 (0%)                 | 0 (0%)                  | –                          |
| Median* (Upper Quartile; Max)                 | –                      | –                       | –                          |
| Other admission (n)                           | 3 (5%)                 | 4 (7%)                  | 0.7 (0.2 to 2.8)           |
| Median* (Upper Quartile; Max)                 | 1 (2; 2)               | 2 (4; 4)                |                            |

Notes: \*number of admissions among those who had had an admission

**Web table S5: Respiratory Outcomes for PROGRAMS trial groups at 5y**

| Outcome                    | GM-CSF ( <i>n</i> = 62) |     | Control ( <i>n</i> = 54) |     | RR 95% CI for worst adverse outcome |                  |
|----------------------------|-------------------------|-----|--------------------------|-----|-------------------------------------|------------------|
|                            | No.                     | %   | No.                      | %   |                                     |                  |
| <b>Chest symptoms</b>      |                         |     |                          |     |                                     |                  |
| <b>Cough</b>               |                         |     |                          |     |                                     |                  |
| > once a week              | 9                       | 14% | 12                       | 22% |                                     |                  |
| Weekly-monthly             | 13                      | 21% | 4                        | 7%  |                                     |                  |
| Once a month or less       | 7                       | 11% | 6                        | 11% |                                     |                  |
| Cough with infection only  | 16                      | 26% | 7                        | 13% | 2.0 (0.9 to 4.5)                    |                  |
| Cough on exercise          | 7                       | 11% | 3                        | 6%  | 2.0 (0.6 to 7.5)                    |                  |
| Disturbed sleep            | 29                      | 47% | 29                       | 37% | 1.3 (0.8 to 2.0)                    |                  |
| Dry night time cough       | 28                      | 45% | 17                       | 31% | 1.4 (0.9 to 2.3)                    |                  |
| <b>Wheeze</b>              |                         |     |                          |     |                                     |                  |
| > once a week              | 1                       | 2%  | 2                        | 4%  |                                     |                  |
| Weekly-monthly             | 6                       | 10% | 2                        | 4%  |                                     |                  |
| Once a month or less       | 10                      | 16% | 2                        | 4%  |                                     |                  |
| Wheeze with infection only | 8                       | 13% | 4                        | 7%  | 1.7 (0.6 to 5.5)                    |                  |
| Wheeze on exercise         | 4                       | 6%  | 2                        | 4%  | 1.7 (0.3 to 9.1)                    |                  |
| Disturbed sleep            | 5                       | 9%  | 12                       | 19% | 2.1 (0.8 to 5.6)                    |                  |
| <b>Chest treatments</b>    |                         |     |                          |     |                                     |                  |
| Antibiotics                | 36                      | 58% | 22                       | 41% | 1.4 (1.0 to 2.1)                    |                  |
| Oxygen                     | 2                       | 3%  | 1                        | 2%  | 1.7 (0.2 to 18.7)                   |                  |
| Bronchodilators            | Current                 | 9   | 15%                      | 4   | 7%                                  | 2.0 (0.6 to 6.0) |
|                            | Last 12mo               | 24  | 39%                      | 12  | 22%                                 | 1.7 (1.0 to 3.1) |
| Inhaled steroids           | Current                 | 6   | 10%                      | 3   | 6%                                  | 1.7 (0.5 to 6.6) |
|                            | Last 12mo               | 20  | 32%                      | 6   | 11%                                 | 2.9 (1.3 to 6.7) |
| Oral steroids              | Current                 | 0   | 0%                       | 1   | 2%                                  | –                |
|                            | Last 12mo               | 3   | 5%                       | 3   | 6%                                  | 0.9 (0.2 to 4.1) |
